# Supplementary material
Source: Springer Nature journal article supplement (https://www.springermedizin.de/resource/supplementary/13012_2013_777_MOESM7_ESM.pdf/9630678)

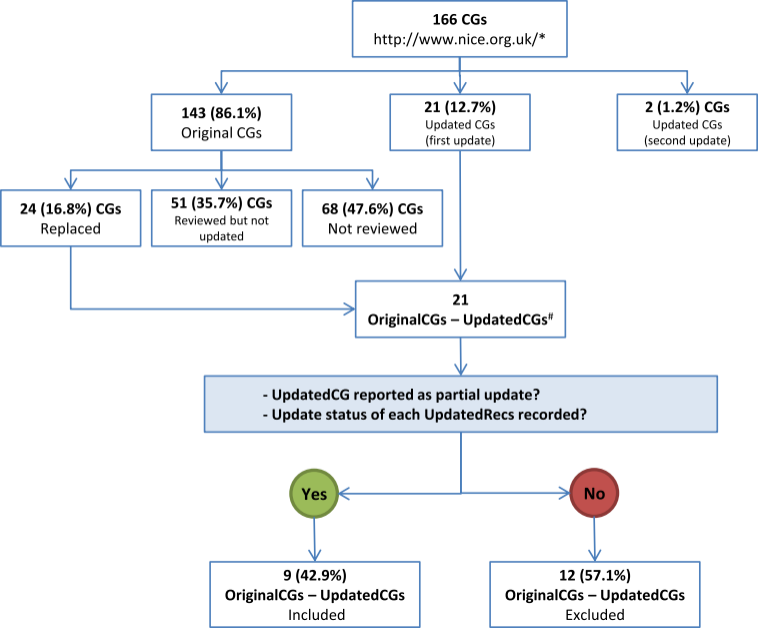

Supplement: MOESM7 [file 9630678]
